# Supplementary material for: Investigation of the blends of chitosan and tragacanth as potential drug carriers for the delivery of ibuprofen in the intestine
Source: Royal Society of Chemistry journal article supplement (doi:10.1039/c9nj03617b), 2019-01-01
Supplement: c9nj03617b1.pdf [file c9nj03617b1.pdf]

## New Journal of Chemistry

### “Supplementary data”

#### **Investigation of Blends of Chitosan and Tragacanth as a Potential for Intestine Delivery of Ibuprofen**

Zohre Dokhaee <sup>a</sup>, Ali Maghsoudi <sup>b</sup>, Payam Ghiaci<sup>c</sup>, Mehran Ghiaci<sup>\*\*</sup>, <sup>a</sup>

<sup>a</sup> Department of Chemistry, Isfahan University of Technology, Isfahan, 8415683111, Iran

<sup>b</sup> Department of Physical Chemistry, Faculty of Chemistry, University of Tehran, Tehran, Iran

<sup>c</sup> Department of Chemistry and Molecular Biology, University of Gothenburg, Gothenburg, Sweden

---

\* Corresponding author. E-mail: [mghiaci@cc.iut.ac.ir](mailto:mghiaci@cc.iut.ac.ir)  
\_Tel: +98 313 391 3254; Fax: +98 313 391 2350

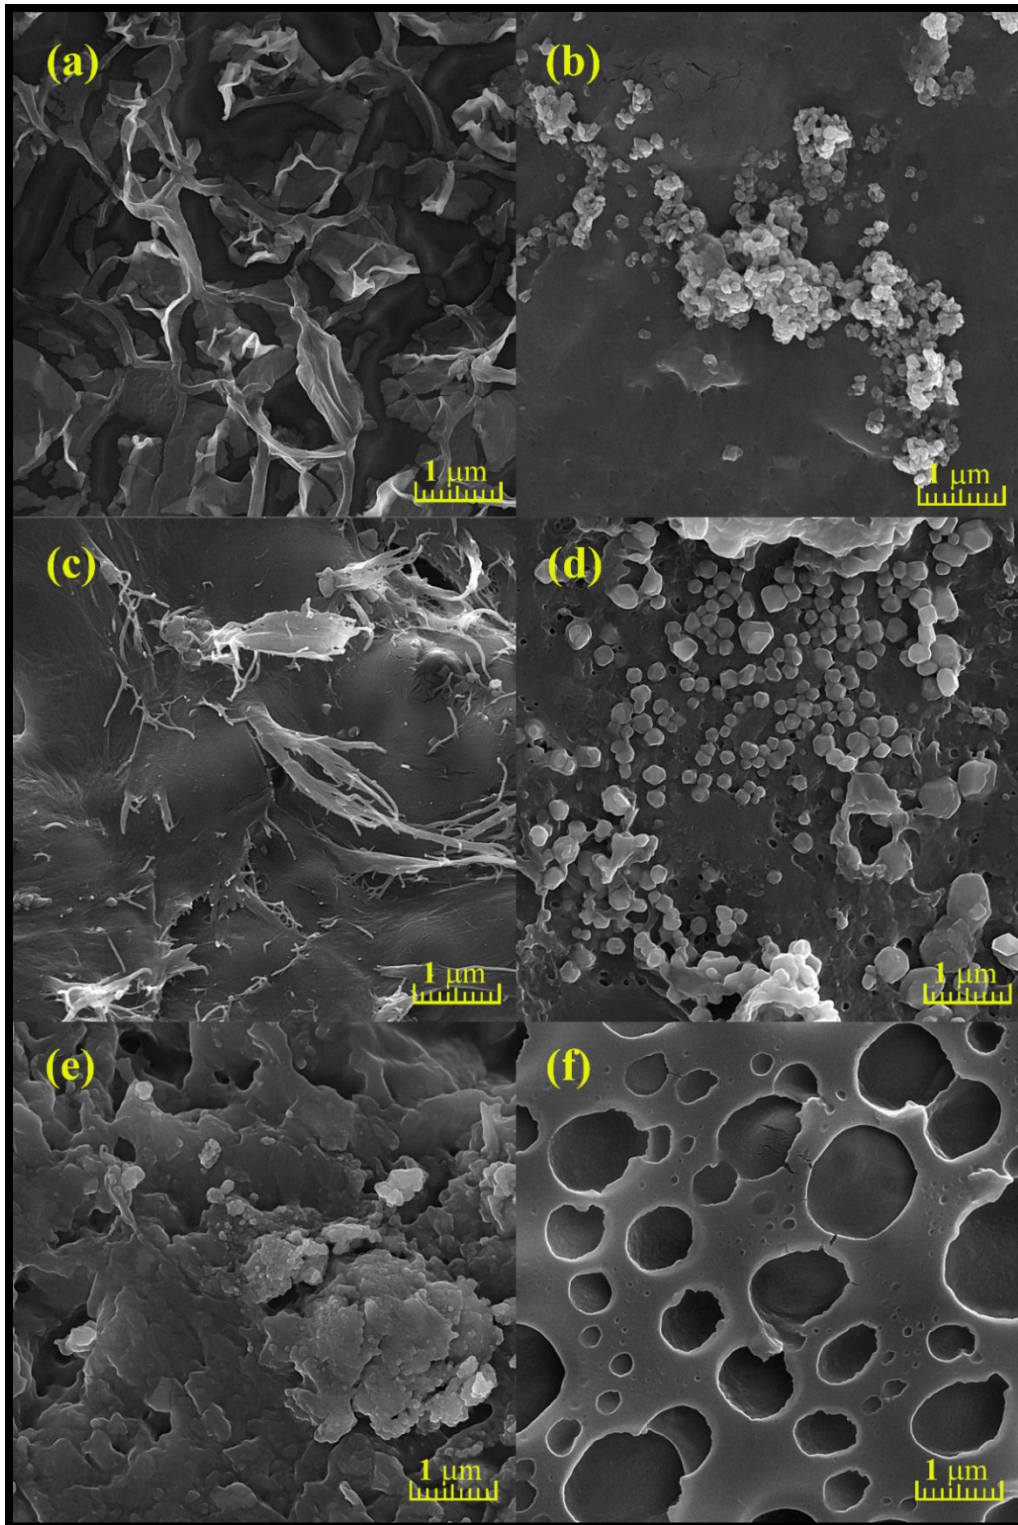

**Fig. S1:** FESEM images of CS-I-T (left column) and T-I-CS (right column) in (a),(b) 5% and (c),(d) 20% and (e),(f) 40% all at 1 μm scale

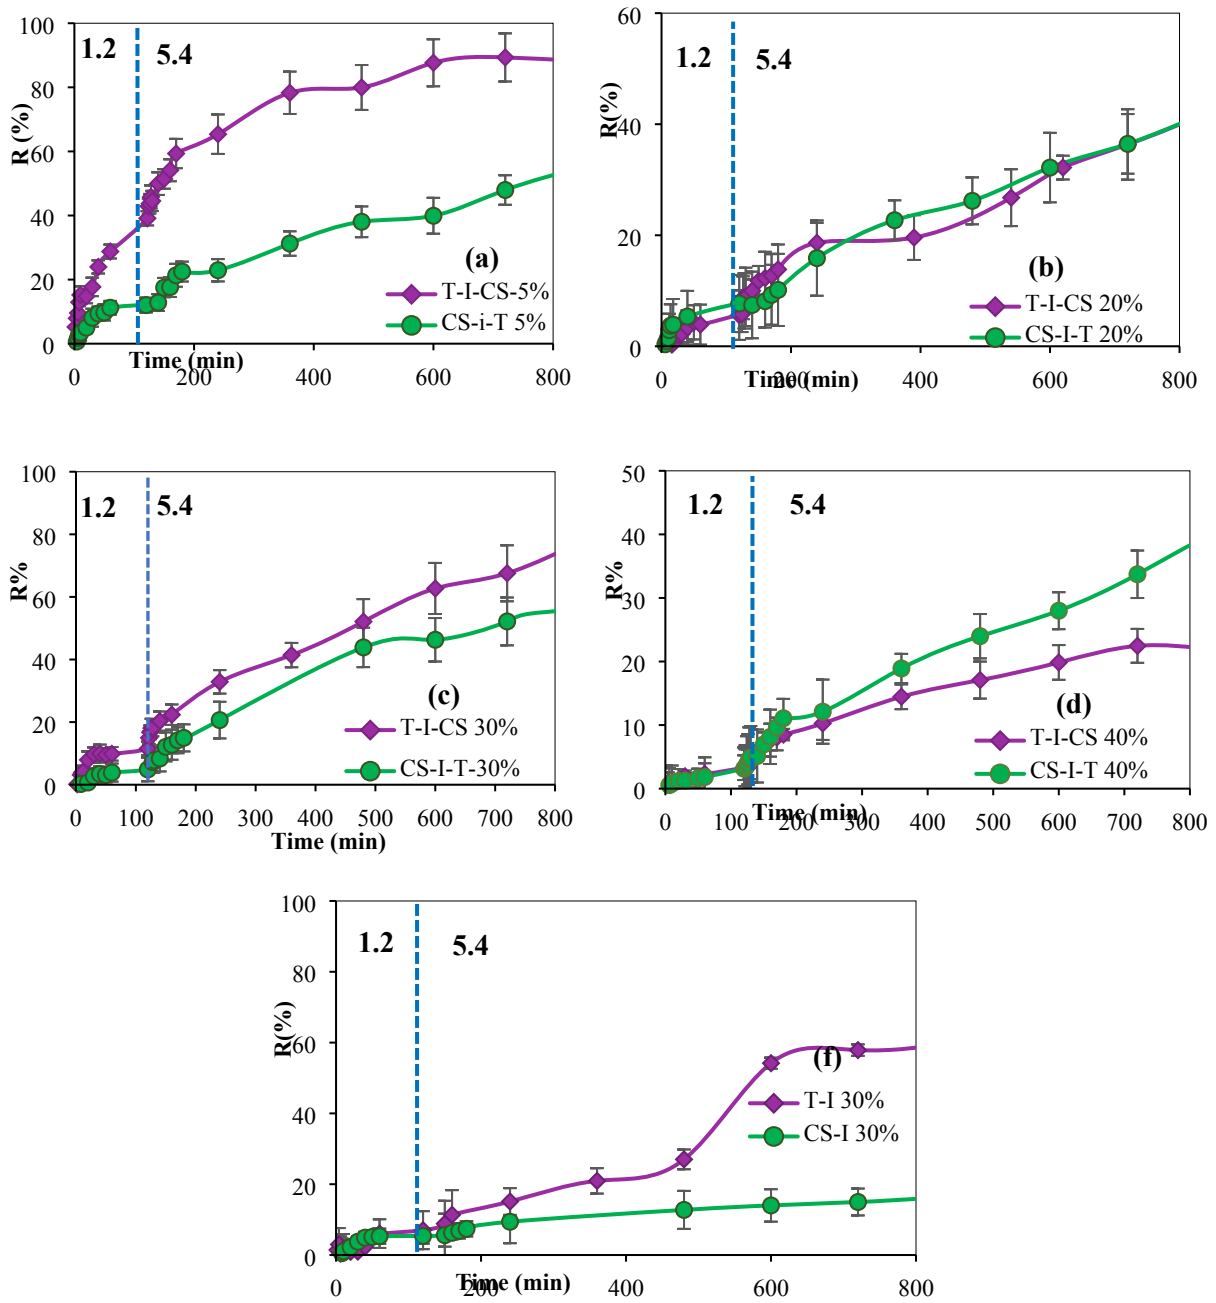

**Fig. S2:** Comparative release charts for PEHs in (a) 5, (b) 20, (c) 30% and (d) 40%, also for (f) 30% without guest polymer in pH= 1.2 and 5.4

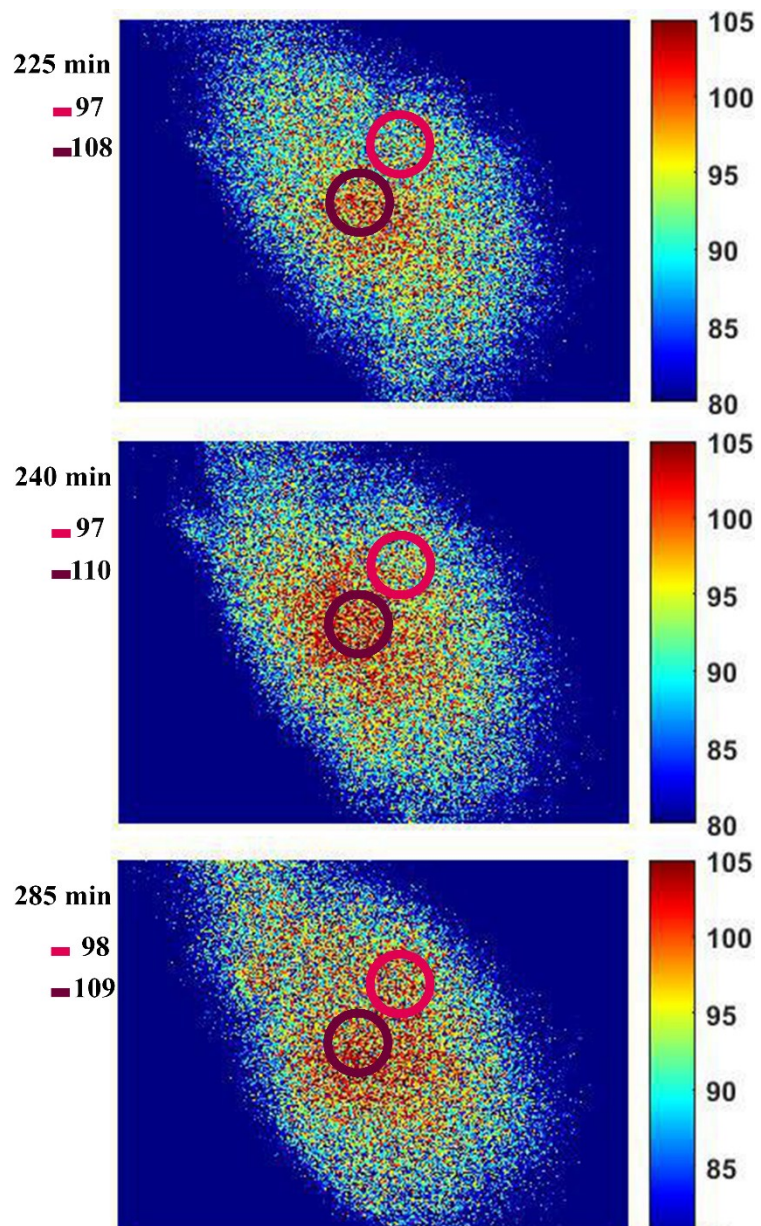

**Fig. S3:** In-vivo fluorescence imaging of a BUDIPY-CS-T
